# Supplementary material for: Seismic detection and tracking of avalanches and slush flows on Mt. Fuji, Japan
Source: Copernicus journal article supplement (doi:10.5194/esurf-2019-25), 2019-06-06
Supplement: Supplementary file 1 [file esurf-2019-25-supplement.pdf]

This supplementary file contains two figures (Sp1 and Sp2):

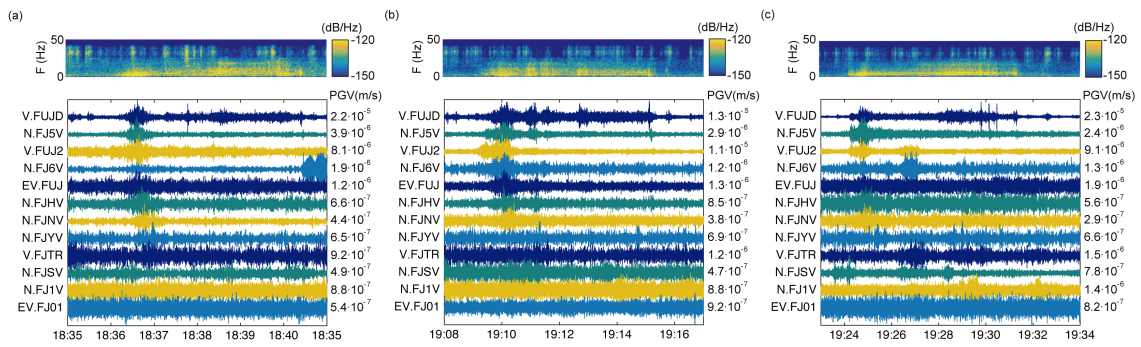

**Sp1.** Spectrogram (computed at V.FUJD station) and vertical seismograms generated by the three, not verified, snow avalanches released on 2014-03-13 (Table 1): avalanche #2 (a), avalanche #3 (b) and avalanche #4 (c). Each trace is normalized by its maximum amplitude (Peak Ground Velocity, PGV).

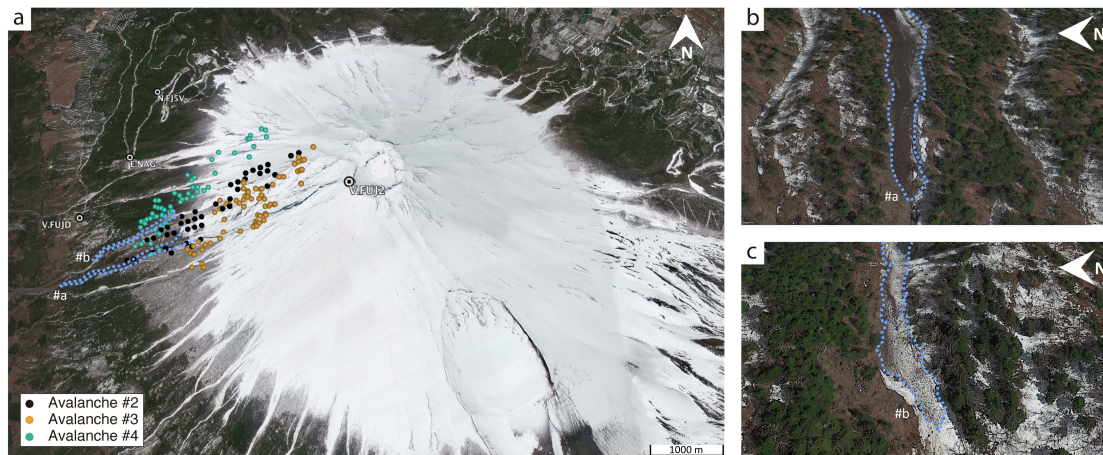

**Sp2.** (a) Historical image from Google Earth aerial images (Image credit: Landsat / Copernicus) of Mt. Fuji taken on 2014-04-7, approximately three weeks after avalanche #1. The image shows the ASL locations of the three avalanches (#2, #3 and #4 of Table 1), which are extended through Osawa valley and a northern parallel path of the W flank of Mt. Fuji. The blue lines show the observed avalanche deposits in the historical image. (b) Close up view of the avalanche deposits observed at path #a. (c) Close up view of the avalanche deposits observed at path #b.
